# Supplementary material
Source: Elsevier journal article supplement (https://www.sciencedirect.com/science/article/pii/S0300289622005968)
Supplement: mmc1 [file S0300289622005968:mmc1.doc]

SUPPLEMENTARY MATERIAL

Table 1S. Pre-test factors associated with a positive methacholine response.

|  | Non-responders  (n=75) | Responders  (n=33) | P value * |
| --- | --- | --- | --- |
| Age (years) | 37.2 (12.3) | 36.3 (12.7) | 0.730 |
| Gender (women) | 40 (53.3) | 25 (75.8) | 0.028 |
| Smoking habit:   - Never smoker - Ex-smoker - Current smoker | 43 (57.3)  27 (36.0)  5 (6.7) | 17 (51.5)  14 (42.4)  2 (6.1) | 0.818 |
| Smoking history (pack-years) | 2.1 (3.3) | 2.2 (3.4) | 0.613‡ |
| Body mass index (kg/m2) | 26.3 (5.2) | 26.6 (6.8) | 0.849‡ |
| Atopy (n) | 34 (45.3) | 24 (72.7) | 0.009 |
| Symptoms of rhinitis (n) | 25 (33.3) | 16 (48.5) | 0.135 |
| FVC (%) | 106.5 (13.3) | 106.1 (13.2) | 0.879 |
| FEV1 (%) | 102.0 (11.8) | 95.5 (11.0) | 0.009 |
| FEV1/FVC (%) | 81.3 (5.2) | 77.7 (6.8) | 0.004 |
| FEV1 reversibility (%) | 3.3 (3.6) | 5.7 (9.7) | 0.123‡ |
| FENO (ppb) | 17.8 (20.1) | 29.9 (27.7) | 0.033‡ |
| Asthma control test (points) | 19.4 (5.4) | 18.1 (5.4) | 0.219‡ |

Values expressed as mean (standard deviation) or absolute (relative) frequencies, depending on the nature of the variable. FVC: Forced vital capacity. FEV1: Forced expiratory volume in 1 second. FENO: Fractional Exhaled Nitric Oxide.

*Calculated with chi-squared of unpaired Student’s t test, unless otherwise specified

‡ Calculated with Mann-Whitney test

Table 2S. Pre-test factors associated with a positive mannitol response.

|  | Non-responders  (n=81) | Responders  (n=27) | P value * |
| --- | --- | --- | --- |
| Age (years) | 36.4 (12.5) | 38.6 (12.2) | 0.422 |
| Gender (women) | 47 (58.0) | 18 (66.7) | 0.427 |
| Smoking habit:   - Never smoker - Ex-smoker - Current smoker | 46 (56.8)  30 (37.0)  5 (6.2) | 14 (51.9)  11 (40.7)  2 (7.4) | 0.900 |
| Smoking history (pack-years) | 1.9 (3.2) | 2.6 (3.7) | 0.501‡ |
| Body mass index (kg/m2) | 26.5 (6.0) | 26.0 (4.9) | 0.910‡ |
| Atopy (n) | 41 (50.6) | 17 (63.0) | 0.265 |
| Symptoms of rhinitis (n | 29 (35.8) | 12 (44.4) | 0.423 |
| FVC (%) | 105.7 (13.0) | 108.6 (13.9) | 0.314 |
| FEV1 (%) | 101.0 (11.9) | 97.1 (11.4) | 0.137 |
| FEV1/FVC (%) | 81.3 (5.0) | 76.8 (7.3) | 0.005 |
| FEV1 reversibility (%) | 3.8 (6.6) | 4.7 (4.6) | 0.071‡ |
| FENO (ppb) | 13.6 (17.7) | 37.2 (30.3) | 0.001‡ |
| Asthma control test (points) | 19.1 (5.5) | 18.7 (5.2) | 0.588‡ |

Values expressed as mean (standard deviation) or absolute (relative) frequencies according to the nature of the variable. FVC: Forced vital capacity. FEV1: Forced expiratory volume in 1 second. FENO: Fractional Exhaled Nitric Oxide.

*Calculated with chi-squared of unpaired Student’s t test, unless otherwise specified

‡ Calculated with Mann-Whitney test
